# Supplementary material
Source: Springer Nature journal article supplement (https://www.springermedizin.de/resource/supplementary/12997_2005_6_MOESM2_ESM.pdf/9623108)

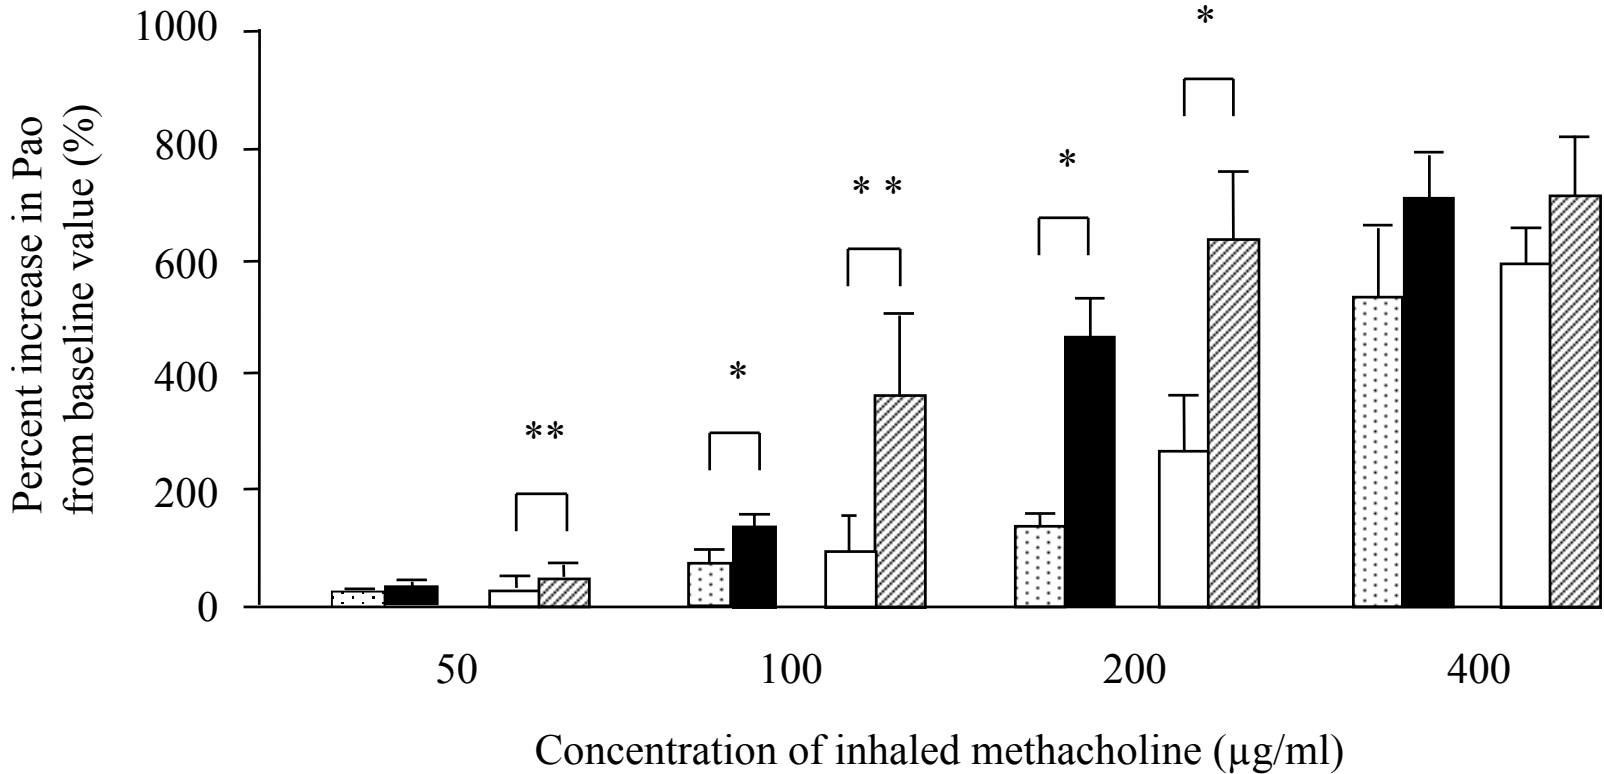

Supplement: MOESM2 [file 9623108]
